# Supplementary material for: Long-Term Antimicrobial Performance of Textiles Coated with ZnO and TiO2 Nanoparticles in a Tropical Climate
Source: MDPI journal article supplement (doi:10.3390/jfb13040233), 2022-11-09
Supplement: s1 [file s1]

**Table S1.** Weather conditions on Hoa Lac (Hanoi, Vietnam).

| Month     | T, °C              |                           |                           |          |          | Humidity, %        |                           |                           |          |          | Rainfall,<br>mm | Total solar<br>irradiation,<br>MJ/m <sup>2</sup> | UV (A/B)<br>Average<br>per hour<br>6 <sup>00</sup> - 18 <sup>00</sup><br>MJ/m <sup>2</sup> |
|-----------|--------------------|---------------------------|---------------------------|----------|----------|--------------------|---------------------------|---------------------------|----------|----------|-----------------|--------------------------------------------------|--------------------------------------------------------------------------------------------|
|           | Monthly<br>average | Monthly<br>average<br>min | Monthly<br>average<br>max | Abs. min | Abs. max | Monthly<br>average | Monthly<br>average<br>min | Monthly<br>average<br>max | Abs. min | Abs. max |                 |                                                  |                                                                                            |
| January   | 20                 | 16                        | 25                        | 14       | 31       | 84                 | 72                        | 93                        | 51       | 95       | 53,3            | 190                                              | 8,5<br>(7,5; 0,4)                                                                          |
| February  | 19                 | 14                        | 24                        | 13       | 28       | 81                 | 47                        | 90                        | 31       | 95       | 26,4            | 265                                              | 14,1<br>(13,0; 0,4)                                                                        |
| March     | 23                 | 21                        | 26                        | 15       | 30       | 86                 | 76                        | 91                        | 47       | 95       | 82,8            | 234                                              | 10,8<br>(9,8; 0,4)                                                                         |
| April     | 22                 | 20                        | 25                        | 14       | 31       | 82                 | 70                        | 91                        | 42       | 94       | 144,8           | 352                                              | 17,8<br>(16,5;0,5)                                                                         |
| May       | 28                 | 23                        | 32                        | 19       | 38       | 85                 | 70                        | 96                        | 50       | 100      | 179,3           | 410                                              | 26,1<br>(24,8;0,5)                                                                         |
| June      | 30                 | 26                        | 33                        | 23       | 39       | 79                 | 60                        | 94                        | 40       | 100      | 315,6           | 621                                              | 39,8<br>(38,3;0,6)                                                                         |
| July      | 30                 | 27                        | 33                        | 22       | 38       | 81                 | 69                        | 91                        | 48       | 100      | 162,5           | 536                                              | 25,9<br>(25,5;0,6)                                                                         |
| August    | 29                 | 25                        | 32                        | 23       | 38       | 90                 | 80                        | 98                        | 52       | 100      | 1020,8          | 410                                              | 29,9<br>(28,5;0,6)                                                                         |
| September | 29                 | 24                        | 31                        | 23       | 38       | 89                 | 77                        | 99                        | 51       | 100      | 591,9           | 382                                              | 26,6<br>(25,3;0,5)                                                                         |
| October   | 24                 | 21                        | 29                        | 16       | 34       | 88                 | 71                        | 98                        | 40       | 100      | 491,1           | 258                                              | 19,5<br>(18,3;0,4)                                                                         |
| November  | 23                 | 20                        | 26                        | 15       | 31       | 87                 | 66                        | 99                        | 38       | 100      | 112,3           | 268                                              | 18,2<br>(17,1;0,4)                                                                         |
| December  | 23                 | 20                        | 26                        | 15       | 31       | 85                 | 67                        | 98                        | 41       | 100      | 12,8            | 211                                              | 13,9<br>(12,8; 0,4)                                                                        |
| Average   | <b>25</b>          |                           |                           |          |          | <b>85</b>          |                           |                           |          |          |                 |                                                  |                                                                                            |
| Total     |                    |                           |                           |          |          |                    |                           |                           |          |          | <b>3193,6</b>   | <b>4137</b>                                      | <b>251,1</b>                                                                               |

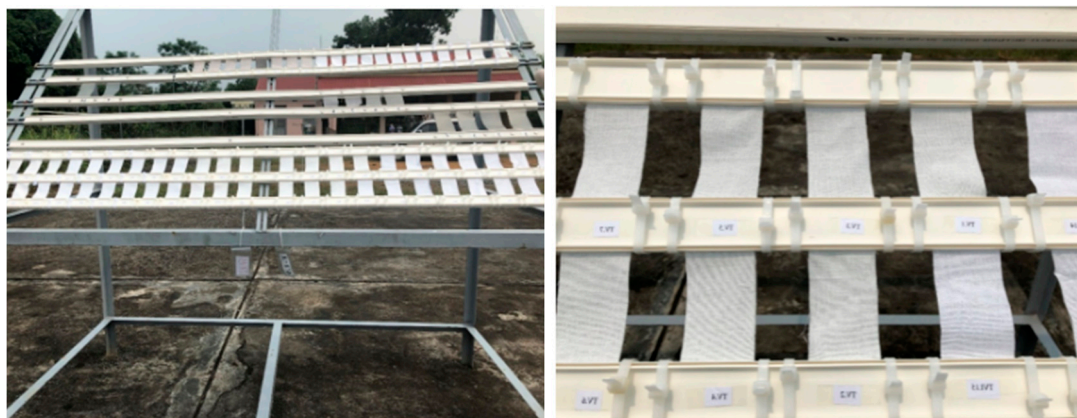

**Figure S1.** Concrete test site.

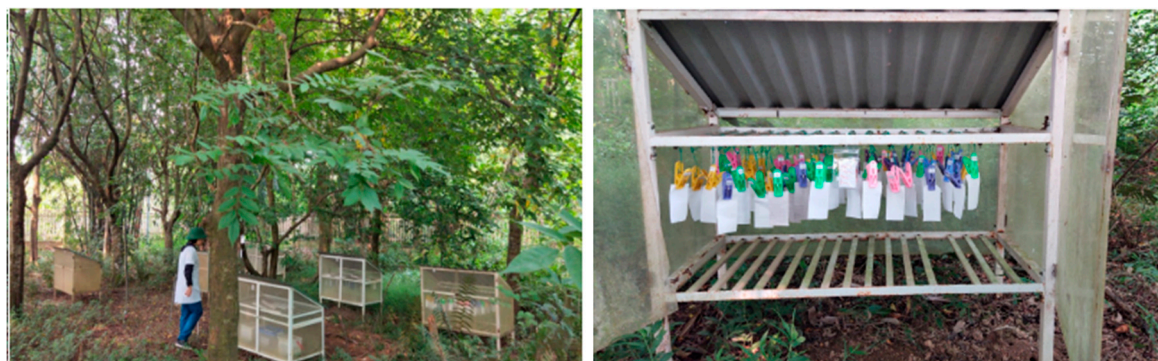

**Figure S2.** Mycological test site.
